# Supplementary material for: A pyridine dicarboxylate based hydrazone Schiff base for reversible colorimetric recognition of Ni2+ and PPi
Source: Royal Society of Chemistry journal article supplement (doi:10.1039/d3ra02021e), 2023-01-01
Supplement: d3ra02021e1.pdf [file d3ra02021e1.pdf]

## A Pyridine Dicarboxylate based Hydrazone Schiff Base for Reversible Colorimetric Recognition of Ni<sup>2+</sup> and PPI

Rashim Bawa,<sup>a</sup> Swati Negi,<sup>a</sup> Bholey Singh,<sup>b</sup> Balaram Pani,<sup>c</sup> Rakesh Kumar<sup>a\*</sup>

<sup>a</sup>*Bioorganic Laboratory, Department of Chemistry, University of Delhi, Delhi, 110007, India*

<sup>b</sup>*Department of Chemistry, Swami Shraddhanand College, University of Delhi, Delhi-110007, India*

<sup>c</sup>*Department of Chemistry, Bhaskaracharya College, University of Delhi, Delhi-110007, India*

*\*Email: rakeshkp@email.com*

### Table of Contents

Figure S1: <sup>1</sup>H NMR of compound **2** in DMSO-*d*<sub>6</sub>.

Figure S2: <sup>13</sup>C NMR of compound **2** in DMSO-*d*<sub>6</sub>.

Figure S3: <sup>1</sup>H NMR of **DAS** in DMSO-*d*<sub>6</sub>.

Figure S4: <sup>13</sup>C NMR of **DAS** in DMSO-*d*<sub>6</sub>.

Figure S5: Fluorescence spectra of **DAS**

Table S1: Crystal data and structure refinement for compound **DAS** and metal complex

Table S2 Sensing abilities of various chemosensors for Ni<sup>2+</sup> ions and phosphate reported in literature

Figure S6: Double decker  $\pi$ -stacked arrangement of two Phenolic and Pyridine ring between the adjacent molecules.

Figure S7: 1D arrangement of **DAS** *via* intra- and intermolecular non-covalent interactions between the adjacent molecules.

## Experimental

### Synthesis of diethyl 2-formyl-6-methyl-4-(4-nitrophenyl) pyridine-3,5-dicarboxylate (**2**)

Selenium dioxide was added to a solution of diethyl 2,6-dimethyl-4-(4-nitrophenyl)-1,4-dihydropyridine-3,5-dicarboxylate (**1**) in 1,4-dioxane and the reaction mixture was refluxed for 10 mins to obtain diethyl 2-formyl-6-methyl-4-(4-nitrophenyl)pyridine-3,5-dicarboxylate (**2**) in 59% yield.

The presence of medium peaks at 2860 and 2895 $\text{cm}^{-1}$  in the IR spectrum indicated the C-H stretching frequency of  $-\text{CHO}$  (aldehyde) group in compound **2**. Further, a sharp band at 1720  $\text{cm}^{-1}$  corresponded to the  $-\text{C}=\text{O}$  group of aldehyde and the ester groups. The  $^1\text{H}$  NMR (Figure 1) displayed characteristic peaks at  $\delta$  9.95 (s) which corresponded to the aldehyde proton ( $-\text{CHO}$ ). In the  $^{13}\text{C}$  NMR, shown in (Figure 2), the characteristic peak of aldehyde carbon appeared at 192.43 ppm. All the protons and carbons of compound **2** have been assigned in the  $^1\text{H}$  and  $^{13}\text{C}$  NMR spectra as shown in (Figures 1 and 2). The high resolution mass spectra (HRMS) peak at  $m/z$  387.1187 for  $[\text{M}+\text{H}]^+$  ion illustrated the presence of **2** with molecular formula  $\text{C}_{19}\text{H}_{18}\text{N}_2\text{O}_7$ .

### Synthesis of diethyl (E)-2-((2-(2-hydroxybenzoyl) hydrazono) methyl)-6-methyl-4-(4-nitrophenyl) pyridine-3, 5-dicarboxylate (**DAS**)

The final product **DAS** was synthesized by mixing ethanolic solutions of diethyl 2-formyl-6-methyl-4-(4-nitrophenyl)pyridine-3,5-dicarboxylate (**2**) and 2-hydroxybenzohydrazide (**4**) and adding a few drops of acetic acid to the resulting reaction mixture. This reaction mixture was refluxed for 6 h to obtain **DAS** in 89% yield.

The IR spectrum showed sharp characteristic peaks for  $-\text{NH}$  at 2976  $\text{cm}^{-1}$  and a broad band for  $-\text{OH}$  at 3320  $\text{cm}^{-1}$ . In the  $^1\text{H}$  NMR (Figure 3), the characteristic peaks of  $-\text{NH}$  and  $-\text{OH}$  appeared at  $\delta$  12.03 ppm and 11.41 ppm, respectively. The imine ( $-\text{N}=\text{CH}$ ) proton occurred at 7.77 ppm. In the  $^{13}\text{C}$  NMR, shown in (Figure 4), the characteristic peak of  $-\text{N}=\text{CH}$  (imine carbon) appeared at 141.97 ppm. The high resolution mass spectra (HRMS) peak at  $m/z$  521.1621 for  $[\text{M}+\text{H}]^+$  ion illustrated the presence of **DAS** with molecular formula  $\text{C}_{26}\text{H}_{24}\text{N}_4\text{O}_8$ . This spectroscopic data obtained, confirmed the formation of the final product **DAS**.

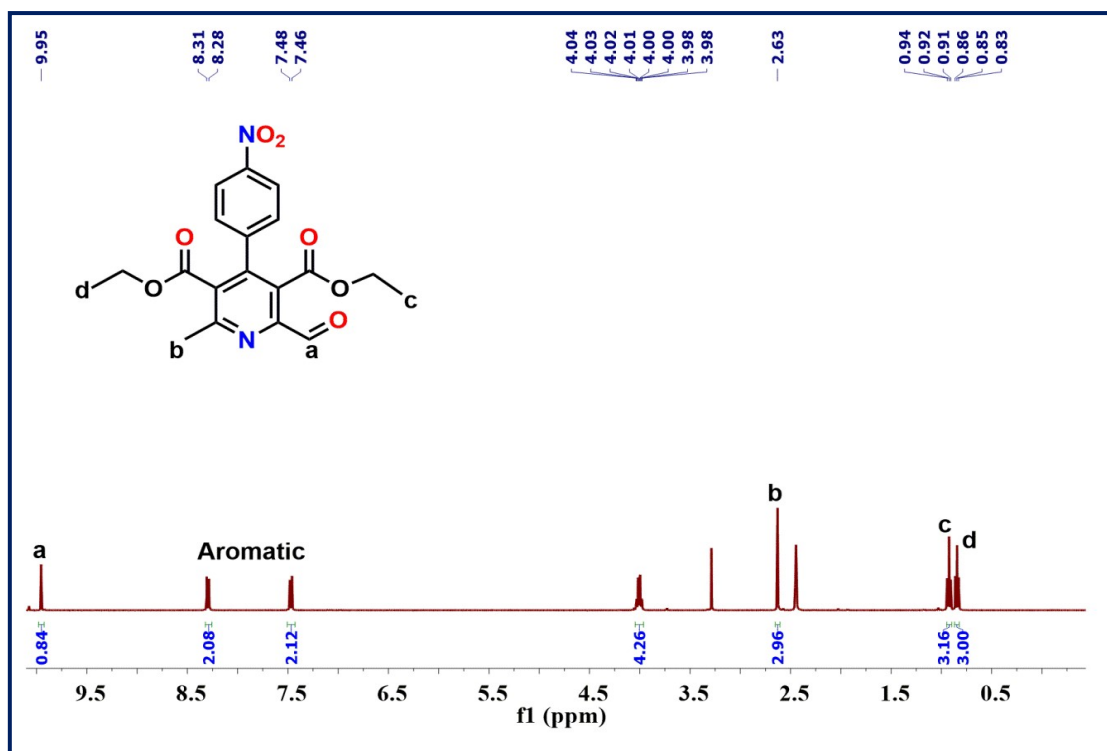

Figure S1:  $^1\text{H}$  NMR of compound 2 in  $\text{DMSO-}d_6$ .

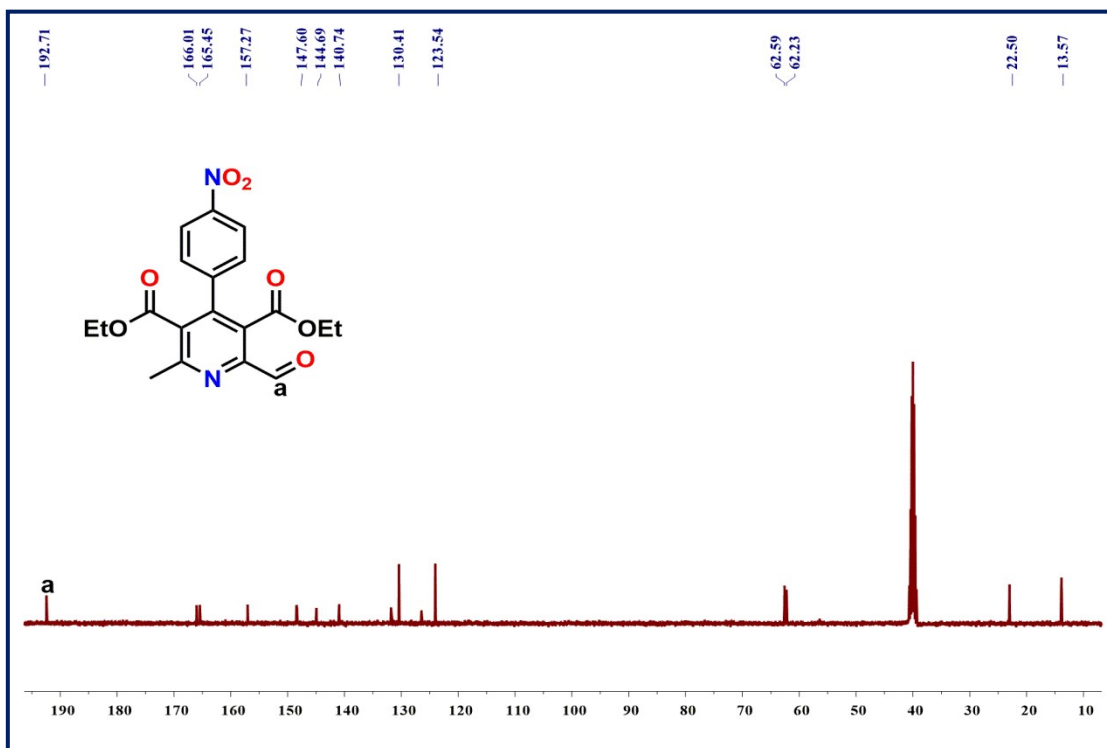

Figure S2:  $^{13}\text{C}$  NMR of compound 2 in  $\text{DMSO-}d_6$ .

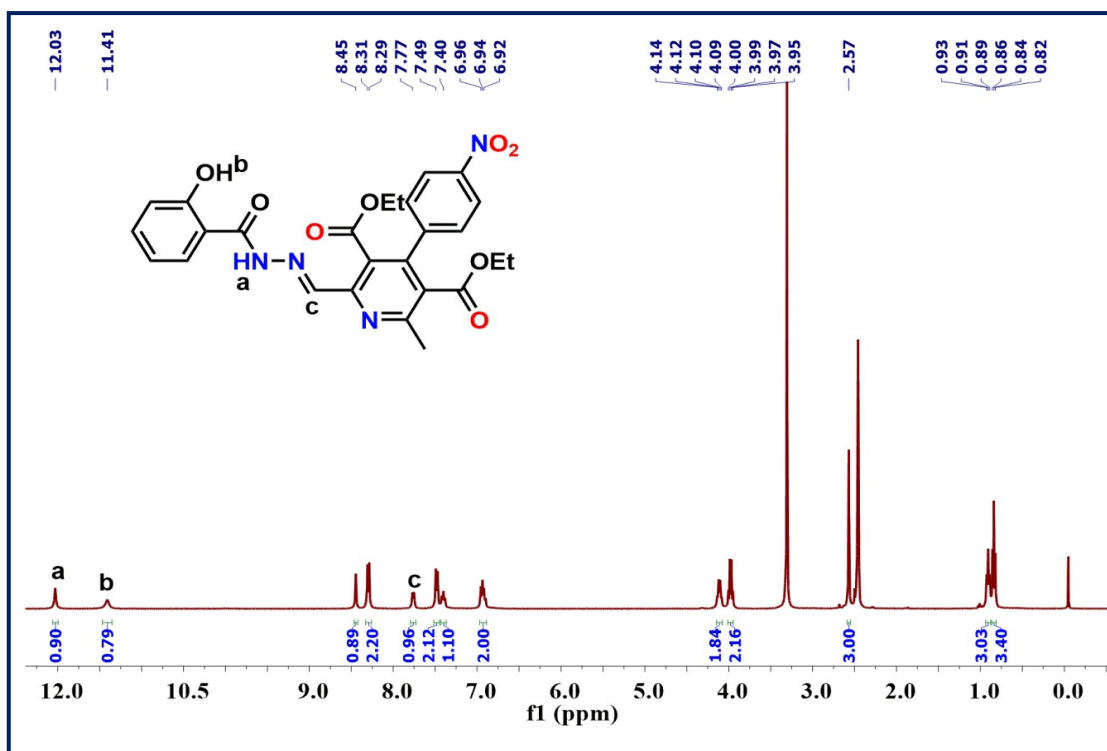

Figure S3:  $^1\text{H}$  NMR of DAS in  $\text{DMSO-}d_6$

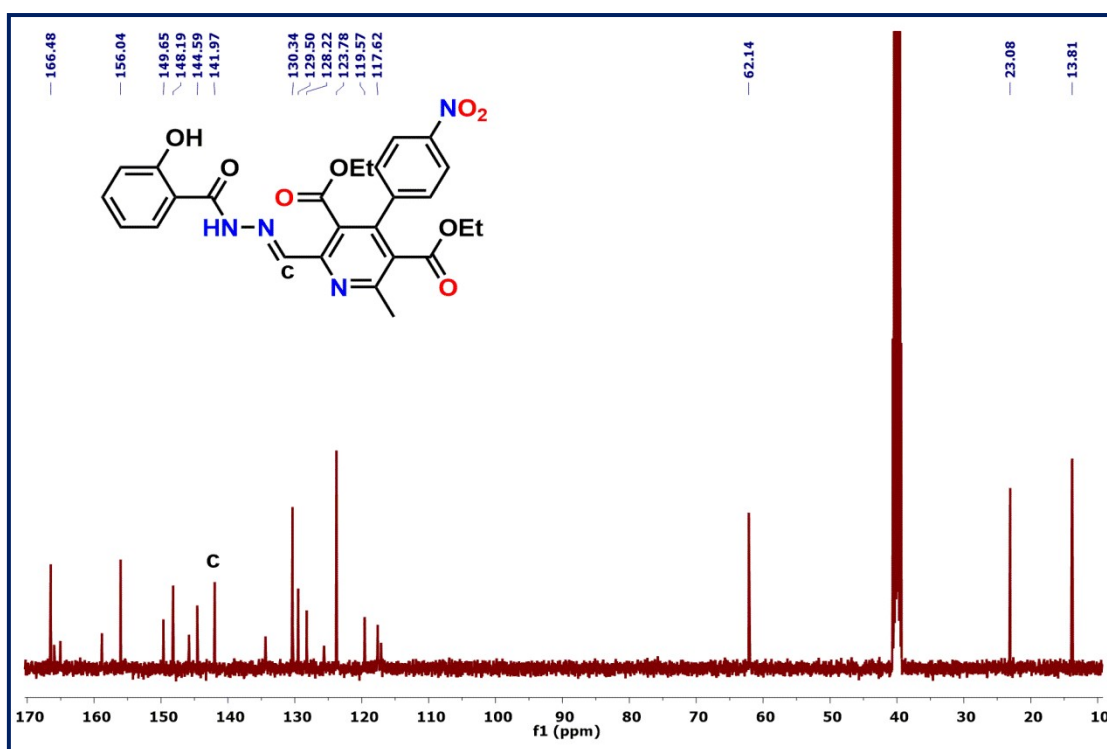

Figure S4:  $^{13}\text{C}$  NMR of DAS in  $\text{DMSO-}d_6$

## Fluorescence spectra

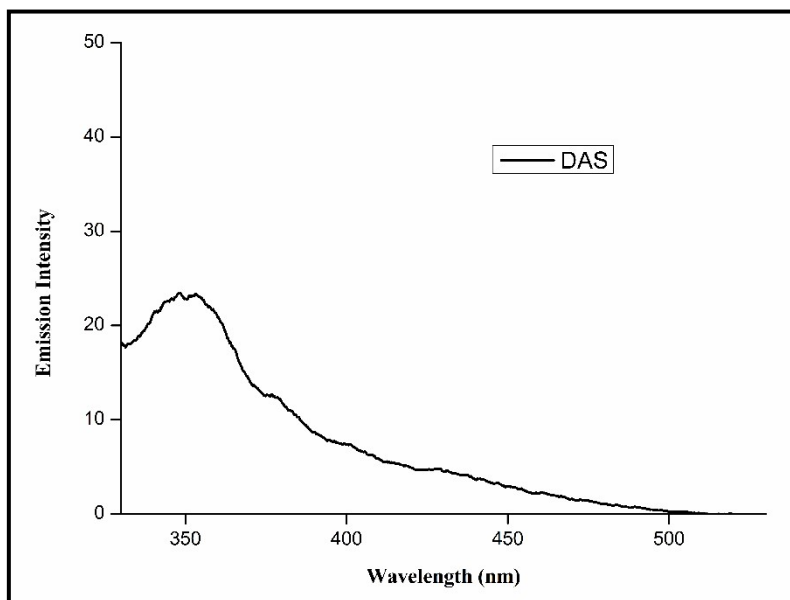

**Figure S5:** Fluorescence spectra of **DAS**

### Single crystal X-ray diffraction analysis

Compound **DAS** was dissolved in methyl alcohol to grow single crystals by allowing slow evaporation of the solvent at room temperature and the metal complex **DAS-Ni<sup>2+</sup>** crystal was obtained by diffusion method layered with acetone for X-ray diffraction studies. The X-ray diffraction data was collected on X'calibur CCD diffractometer employing a graphite monochromatized Mo/K $\alpha$  radiation ( $\lambda = 0.71073 \text{ \AA}$ ) at temperature 100 K for **DAS** and 293K for metal complex. The crystal data was reduced using CrysAlis pro software available with the diffractometer. Further, least square refinement after introduction of anisotropic displacement parameters yielded the R values mentioned in the (**Table 1**) The structure was solved by direct methods using SHELXT-2014 and refined by the full-matrix least-squares method on  $F^2$  (SHELXT-2014/5) . All calculations were carried out using the OLEX2 package of the crystallographic programs. For the molecular graphics, the program Mercury (4.2.0) was used. The selected bond lengths, bond angles, *etc.* are given in (**Table 1**).

**Table S1** Crystal data and structure refinement for compound **DAS** and metal complex

| Identification code                                     | DAS                                                           | DAS-Ni <sup>2+</sup>                                                              |
|---------------------------------------------------------|---------------------------------------------------------------|-----------------------------------------------------------------------------------|
| Empirical formula                                       | C <sub>26</sub> H <sub>24</sub> N <sub>4</sub> O <sub>8</sub> | C <sub>208</sub> H <sub>169</sub> N <sub>32</sub> O <sub>66</sub> Ni <sub>4</sub> |
| Temperature/K                                           | 100                                                           | 296(2)                                                                            |
| Crystal system                                          | monoclinic                                                    | monoclinic                                                                        |
| Space group                                             | P 21/n                                                        | P-1                                                                               |
| a/Å                                                     | 7.2016 (3)                                                    | 16.418(6)                                                                         |
| b/Å                                                     | 18.2857 (12)                                                  | 19.301(7)                                                                         |
| c/Å                                                     | 18.8379 (13)                                                  | 35.287(12)                                                                        |
| α/°                                                     | 90                                                            | 82.233(8)                                                                         |
| β/°                                                     | 97.855 (3)                                                    | 90                                                                                |
| γ/°                                                     | 90                                                            | 90                                                                                |
| Volume/Å <sup>3</sup>                                   | 2457.4 (3)                                                    | 11080(7)                                                                          |
| Z                                                       | 49                                                            | 139                                                                               |
| ρ <sub>calc</sub> /cm <sup>3</sup>                      | 1.4068                                                        | 2.119                                                                             |
| μ/mm <sup>-1</sup>                                      | 0.106                                                         | 5.814                                                                             |
| F(000)                                                  | 1088.6424                                                     | 6950.0                                                                            |
| Radiation                                               | Mo/K <sub>α</sub> (λ = 0.71073)                               | Mo/K <sub>α</sub> (λ = 0.71073)                                                   |
| 2θ range for data collection/°                          | 2.230 to 28.04                                                | 1.919 to 27.824                                                                   |
| Index ranges                                            | -10 ≤ h ≤ 10, -10 ≤ k ≤ 10, -20 ≤ l ≤ 20                      | -21 ≤ h ≤ 21, -25 ≤ k ≤ 25, -45 ≤ l ≤ 45                                          |
| No of Reflections measured                              | 10693                                                         | 51315                                                                             |
| Independent reflections                                 | 5644                                                          | 11466                                                                             |
| Goodness-of-fit on F <sup>2</sup>                       | 1.0076                                                        | 1.168                                                                             |
| R [F <sup>2</sup> > 2σ (F <sup>2</sup> )], wR(all data) | 0.0981,<br>0.1436                                             | 0.2187,<br>0.3936                                                                 |

### Accession Codes

CCDC 2206485 and 2206486 contain the supplementary crystallographic data for ligand as well as metal complex for this paper. These data can be obtained free of charge via [www.ccdc.cam.ac.uk/data\\_request/cif](http://www.ccdc.cam.ac.uk/data_request/cif), or by emailing [data\\_request@ccdc.cam.ac.uk](mailto:data_request@ccdc.cam.ac.uk), or by contacting The Cambridge Crystallographic Data Centre, 12 Union Road, Cambridge CB2 1EZ, UK; fax: +44 1223 336033

**Table S2** Sensing abilities of various chemosensors for Ni<sup>2+</sup> ions and phosphate reported in literature

| S.No. | Chemosensors                                                                        | Ions Detected    | Phosphate Detection            | Detection Limit (in μM) | Ref.         |
|-------|-------------------------------------------------------------------------------------|------------------|--------------------------------|-------------------------|--------------|
| 1.    | 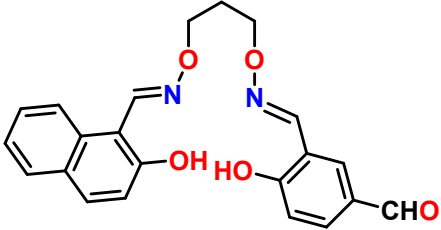   | Ni <sup>2+</sup> | HPO <sub>4</sub> <sup>2-</sup> | 0.03                    | 1            |
| 2.    |   | Ni <sup>2+</sup> | -                              | 0.361                   | 2            |
| 3.    |  | Ni <sup>2+</sup> | -                              | 1.47                    | 3            |
| 4.    |  | Ni <sup>2+</sup> | PPi                            | 0.14                    | Present Work |

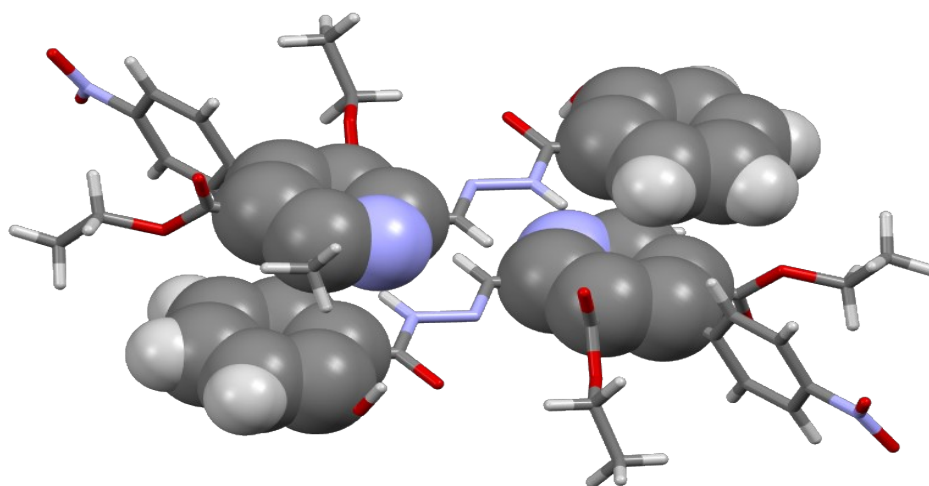

**Figure S6:** Double decker  $\pi$ -stacked arrangement of two Phenolic and Pyridine ring between the adjacent molecules.

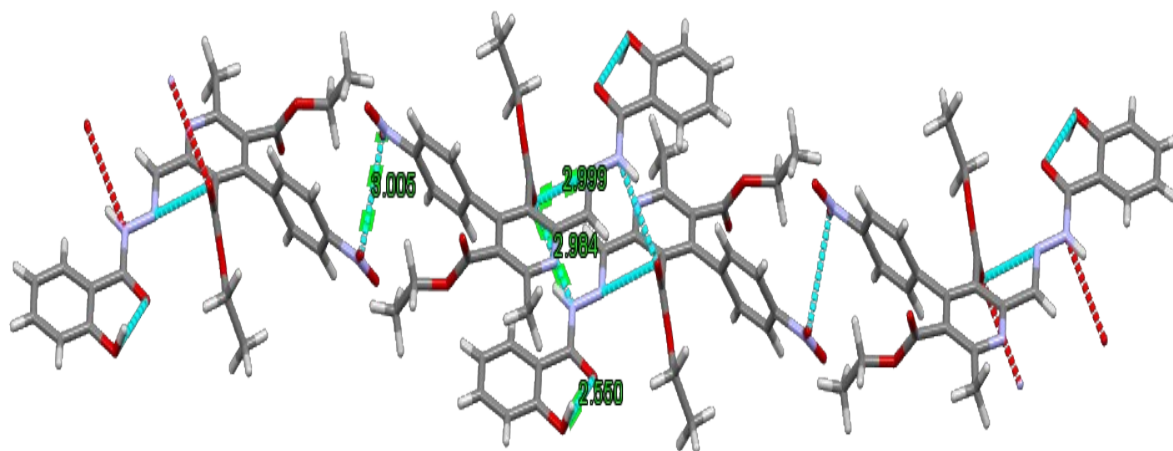

**Figure S7:** 1D arrangement of DAS *via* intra- and intermolecular non-covalent interactions between the adjacent molecules.

#### References:

1 L.-P. Na, L. Dou, Y.-J. Yan, R.-Y. Li and W.-K. Dong, *J. Photochem. Photobiol. A Chem.*, 2022, **432**, 114061.

2 G. G. V. Kumar, M. P. Kesavan, M. Sankarganesh, K. Sakthipandi, J. Rajesh and G. Sivaraman, *New J. Chem.*, 2018, **42**, 2865–2873.



3 S. Goswami, S. Chakraborty, S. Paul, S. Halder and A. C. Maity, *Tetrahedron Lett.*, 2013, **54**, 5075–5077.
